# Supplementary material for: Construction of a 3D flower-like NiO/Mn 3 O 4 heterojunction using Tulsi leaf extract for enhanced photodegradation of thiamethoxam pesticide and organic dyes under direct sunlight
Source: Royal Society of Chemistry journal article supplement (doi:10.1039/d4ma00708e), 2024-01-01
Supplement: d4ma00708e1.pdf [file d4ma00708e1.pdf]

## Supplementary Information

### Construction of 3D flower like NiO/Mn<sub>3</sub>O<sub>4</sub> heterojunction using Tulsi leaf extract for enhanced photodegradation of thiamethoxam pesticide and organic dyes under direct sunlight

Mandvi<sup>a</sup>, Prit Pal Singh<sup>a</sup>, Suhas Ballal<sup>b</sup>, Mamta Chahar<sup>c</sup>, Jaya Bansal<sup>d</sup>, Ranvijay Kumar<sup>e</sup>,  
Sandeep Kumar<sup>f</sup>, Sandeep Kaushal<sup>g</sup>

<sup>a</sup> Sri Guru Granth Sahib World University, Fatehgarh Sahib, Punjab, India

<sup>b</sup> Jain (Deemed to be University), Bangalore, Karnataka, India

<sup>c</sup> NIMS Institute of Engineering and Technology, NIMS University, Jaipur, Rajasthan, India

<sup>d</sup> Chandigarh Engineering College, Jhanjeri, Mohali, Punjab, India

<sup>e</sup> University Centre for Research and Development, Chandigarh University, Gharuan,  
Mohali, Punjab, India

<sup>f</sup> Akal University, Talwandi Sabo, Punjab, India

<sup>g</sup> Regional Institute of Education, NCERT, Ajmer, Rajasthan, India

#### Technique and instrumentation used for studies:

FTIR spectra of the nanocomposite were recorded using Perkin Elmer RXI FTIR spectrometer. The morphological investigations of the nanocomposite were done using FESEM (Carl Zeiss Supra 55) and HRTEM (Jeol Jem 2100 Plus). The structural nature of the heterojunction was studied by X-ray diffractometer (XRD, X'Pert PRO) at  $2\theta = 10-70^\circ$ . XPS (Thermo Fisher Scientific Escalab Xi<sup>+</sup>) was employed to estimate the elemental composition of the metal oxides heterojunction. The adsorption parameters of metal oxides heterojunction were investigated by the Brunauer-Emmett-Teller (BET) method. Zeta-potential analysis was achieved using Zetasizer Nano-ZS90 (Malvern Inc.).

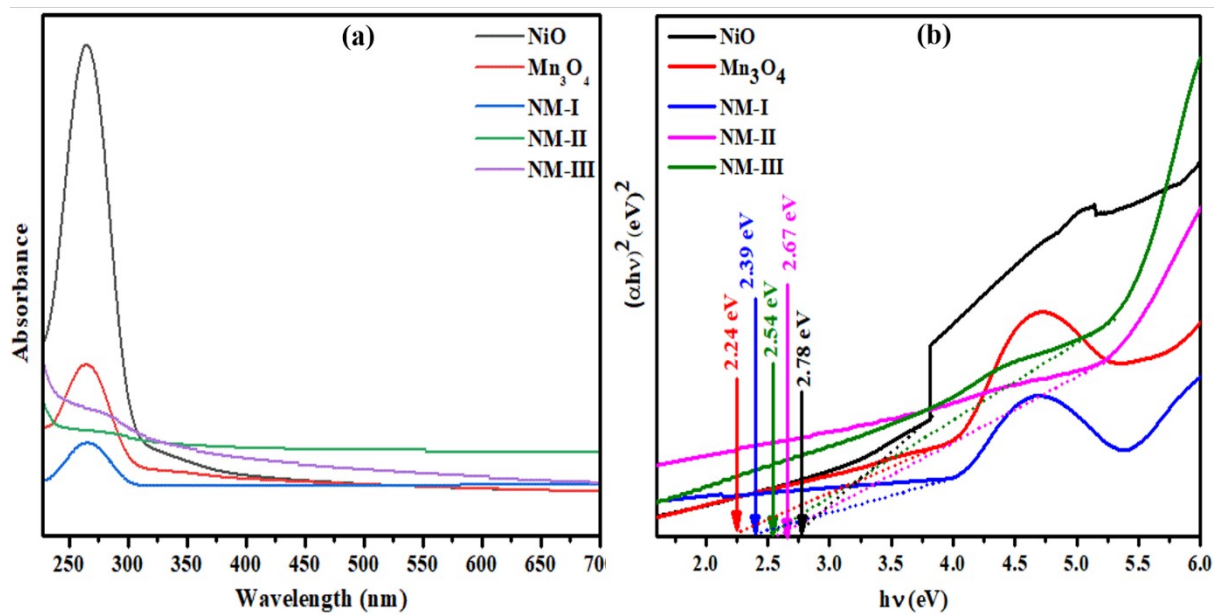

Fig. S1 a) XRD patterns of pure NiO, Mn<sub>3</sub>O<sub>4</sub> and NiO/Mn<sub>3</sub>O<sub>4</sub> heterojunction samples

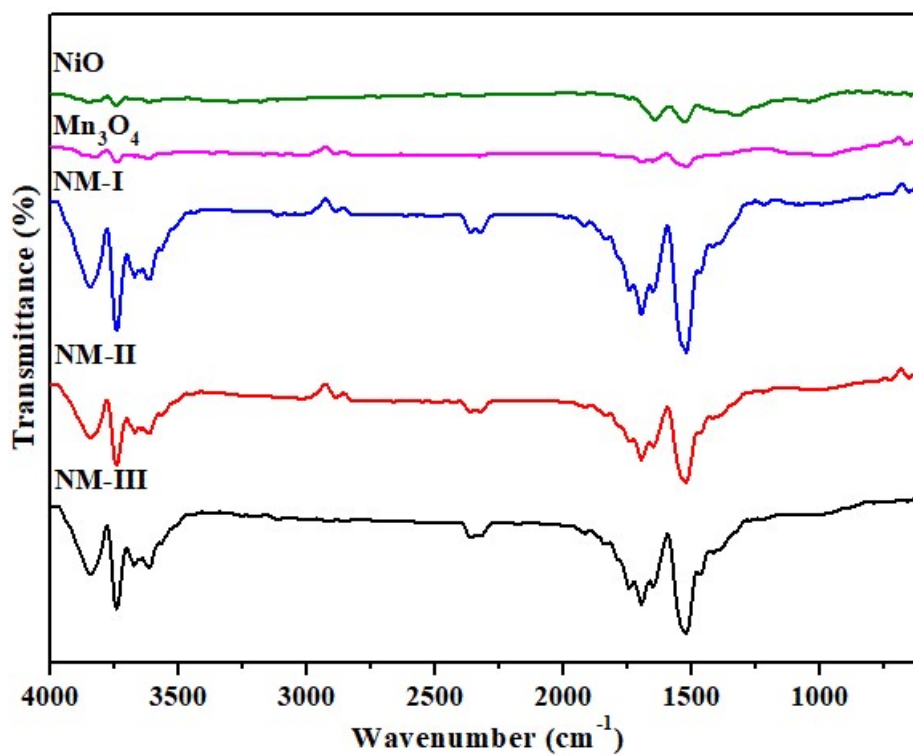

Fig. 2S. FTIR spectra of pure NiO, Mn<sub>3</sub>O<sub>4</sub> and NiO/Mn<sub>3</sub>O<sub>4</sub> heterojunction samples

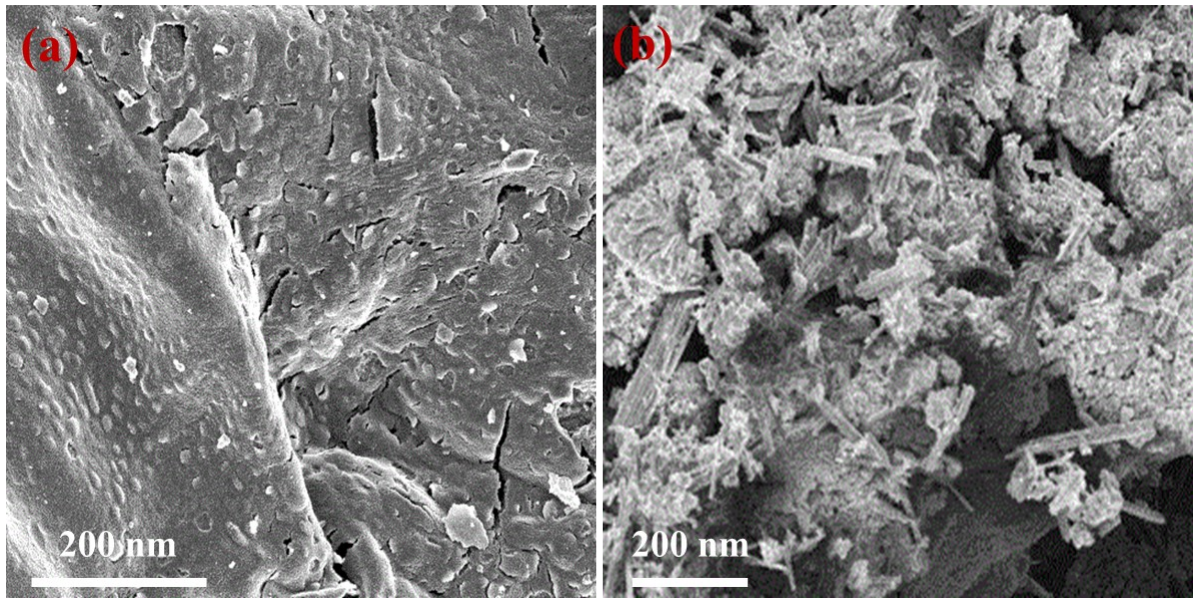

**Fig. 3S** Field-emission scanning electron microscopy images of a) NiO nanoparticles and b)  $\text{Mn}_3\text{O}_4$  nanoparticles

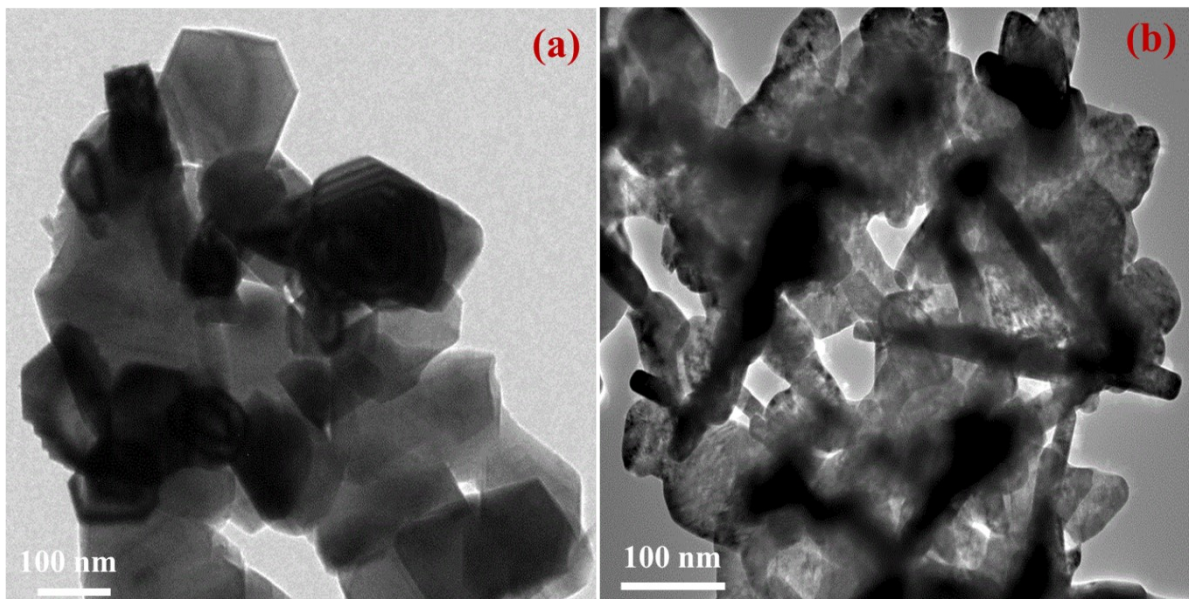

**Fig. 4S** High resolution transmission electron microscopy images of a) NiO nanoparticles and b)  $\text{Mn}_3\text{O}_4$  nanoparticles

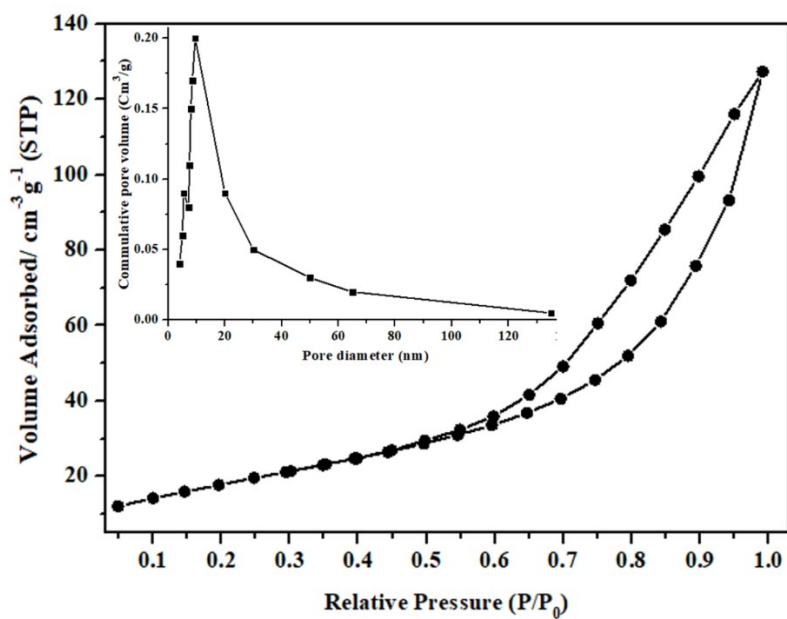

**Fig. S3.** N<sub>2</sub> adsorption–desorption isotherm curves of NiO/Mn<sub>3</sub>O<sub>4</sub> of heterojunction (inset: pore size distributions)

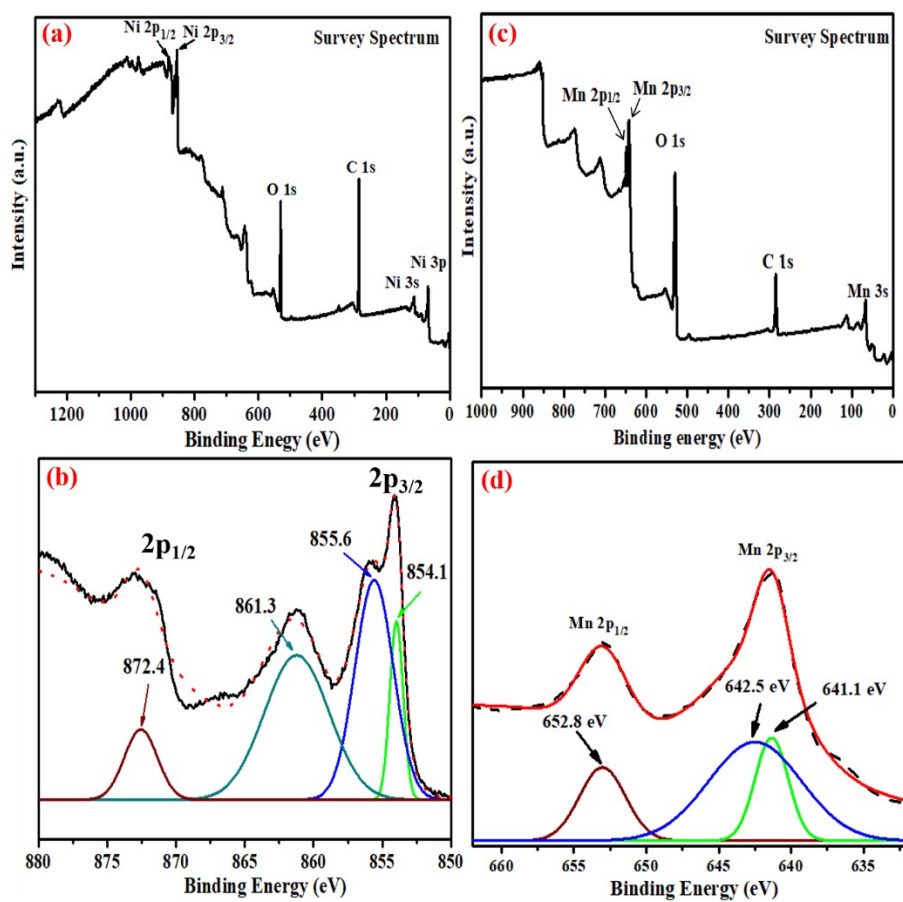

**Fig. S6** High resolution XPS spectra of a, b) NiO and c, d) Mn<sub>3</sub>O<sub>4</sub> NPs

The distinctive binding energy (eV) peaks related to Ni, O, and C in the NPs are evident in the survey spectrum (Fig. S5a). Ni  $2p_{3/2}$  and Ni  $2p_{1/2}$  peaks are supported by the observed Ni 2p spectra. The typical peaks of Ni<sup>2+</sup>  $2p_{3/2}$  and its satellite peaks have been identified at 854.1, 855.6, and 861.3 eV, each, as shown in Fig. S5b. In contrast, the Ni<sup>2+</sup>  $2p_{1/2}$  peak was detected at 872.6 eV, suggesting the formation of NiO structures. Similarly, the survey spectrum of Mn<sub>3</sub>O<sub>4</sub> NPs revealed the presence of Mn, O and C elements in the metal oxide NPs (Fig. 5c). The 2p peak generates two potential states,  $2p_{3/2}$  and  $2p_{1/2}$ , as a result of spin-orbit splitting of Mn (Fig. S5d). Of these, the Mn<sup>2+</sup> state is associated with two peaks at 641.1 eV (Mn  $2p_{3/2}$ ) and 652.8 eV (Mn  $2p_{1/2}$ ), whereas the Mn<sup>4+</sup> state is linked to the remaining peak at 642.5 eV (Mn  $2p_{3/2}$ ).

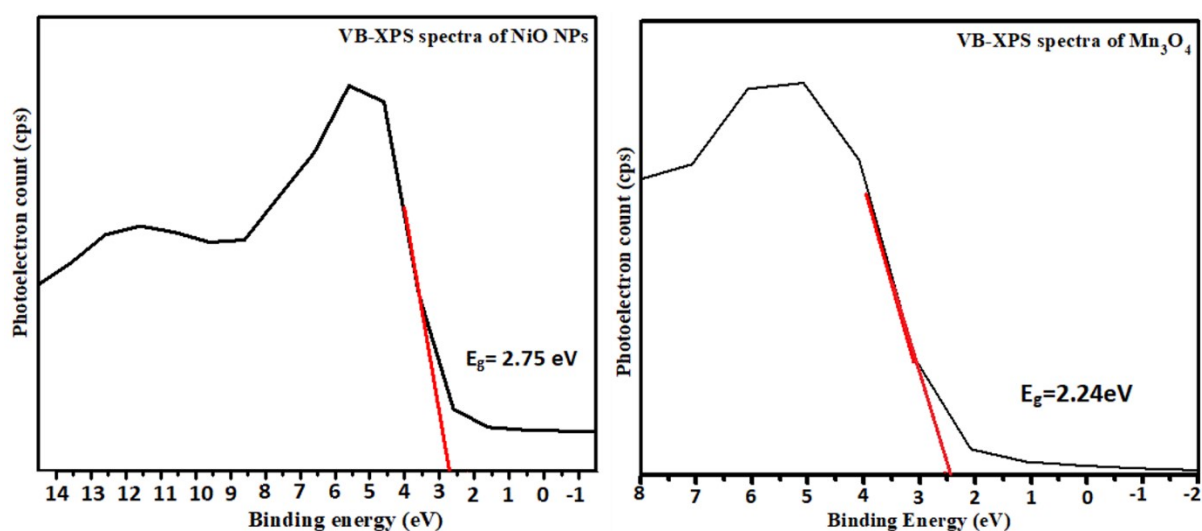

**Fig. S7.** VB-XPS spectra of NiO and Mn<sub>3</sub>O<sub>4</sub> nanoparticles.

Further, XPS was employed for the analysis of valence band maximum (VBM) values for NiO and Mn<sub>3</sub>O<sub>4</sub> NPs. From VB-XPS, valence band energy corresponding to NiO was found to be 2.75 eV and for Mn<sub>3</sub>O<sub>4</sub>, valence band maxima was observed to be 2.24 eV as shown in Fig. S3. From these VBM values, conduction band (CB) energy was calculated by following the equation:

$$E_{CB} = E_{VB} - E_g$$

$E_g$  value of NiO and Mn<sub>3</sub>O<sub>4</sub> corresponds to 2.78 eV and 2.24 eV, respectively. Using the above equation,  $E_{CB}$  values obtained for NiO and Mn<sub>3</sub>O<sub>4</sub> were  $-0.13$  eV and  $-0.05$  eV which proved to be outstanding for photocatalytic reaction.

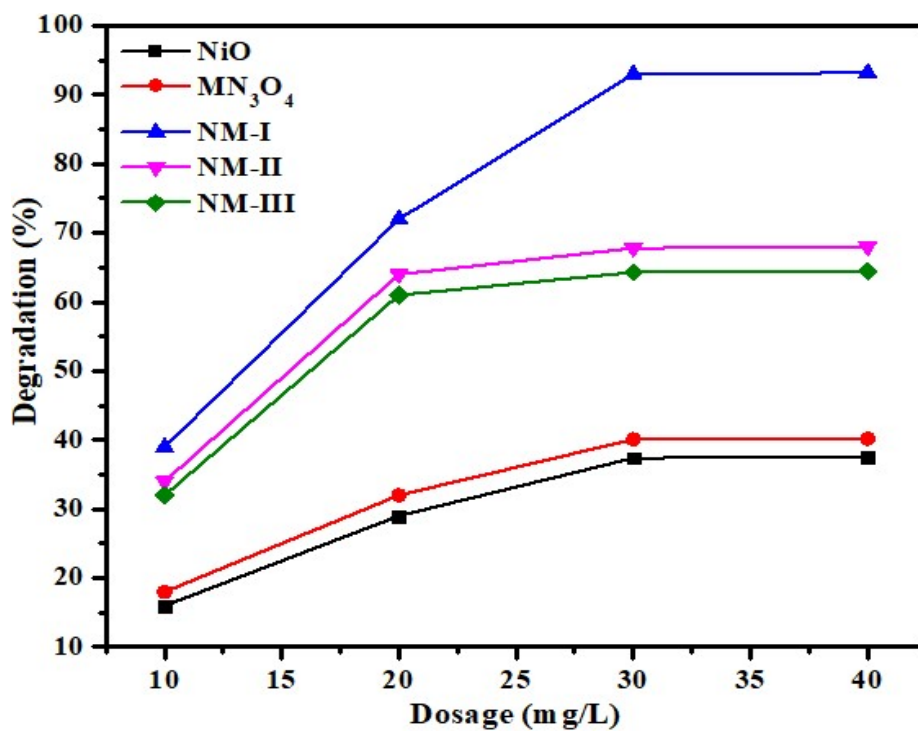

Fig. S8 Effect of dosage on percentage adsorption of THX

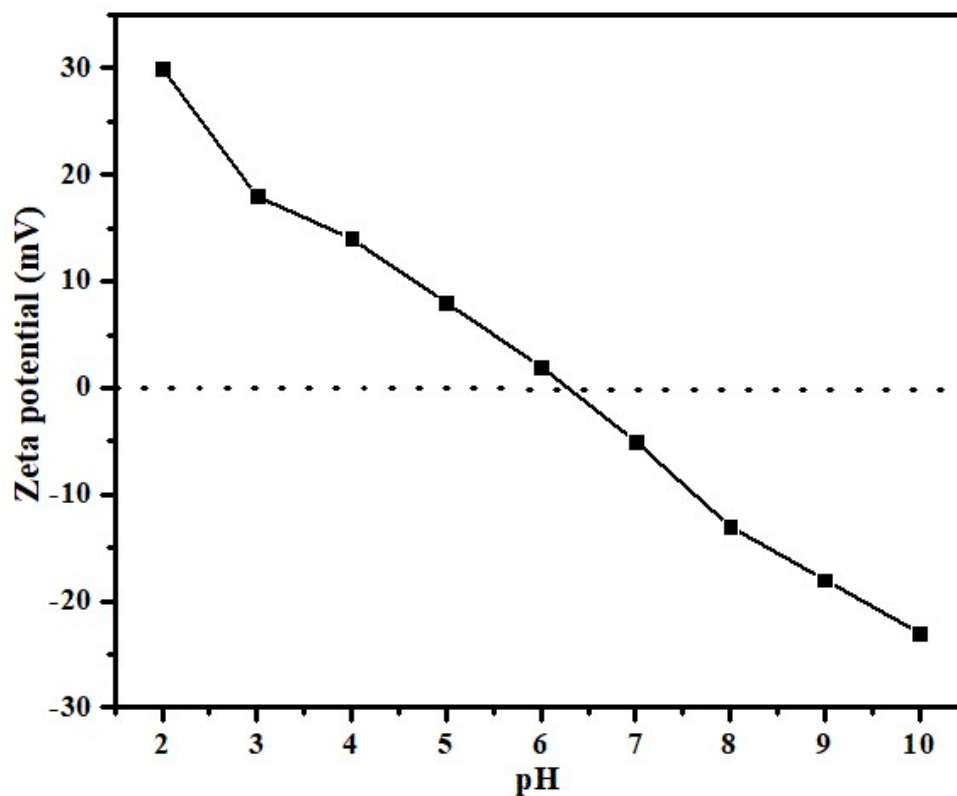

Fig. S9 Zeta potential of as synthesized NiO/Mn<sub>3</sub>O<sub>4</sub> of heterojunction

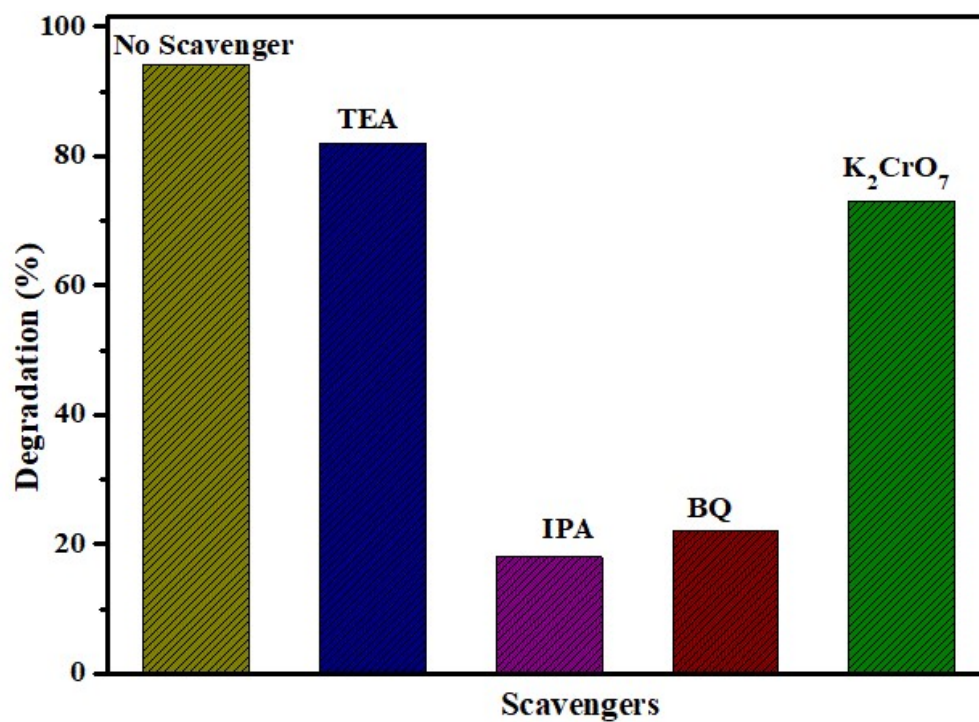

Fig. S10 Effect of scavengers on the degradation of TMX

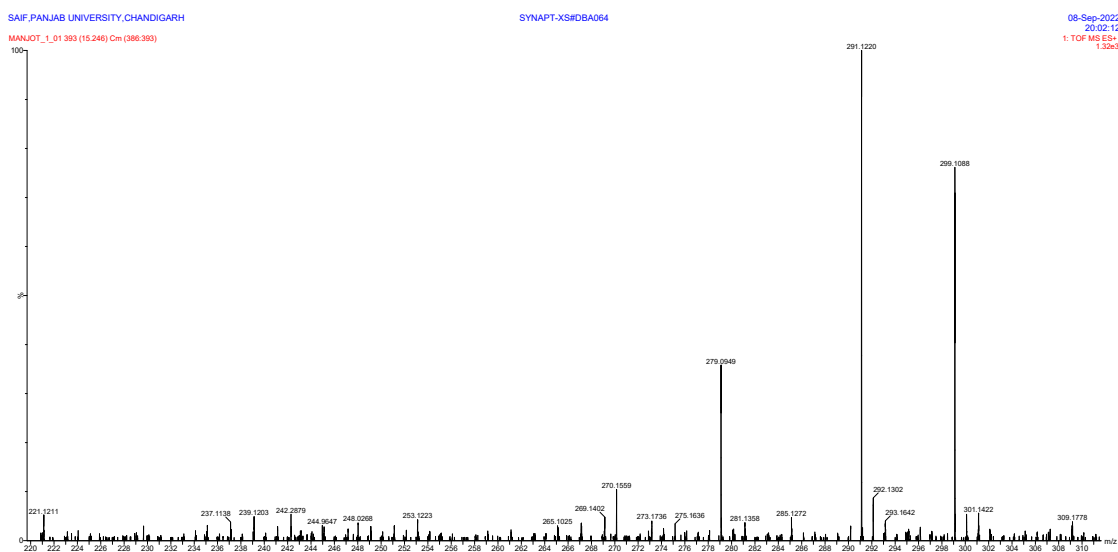

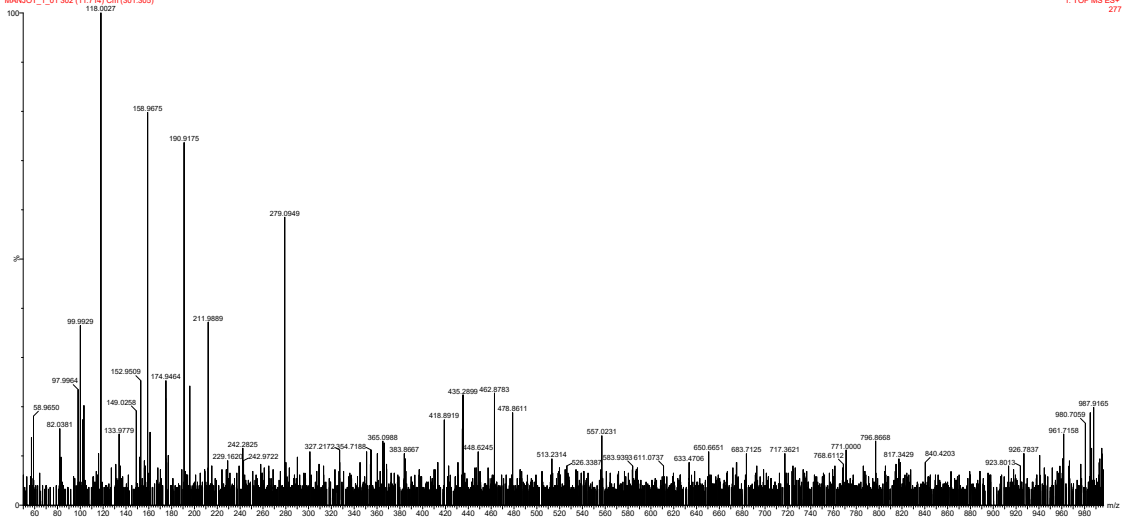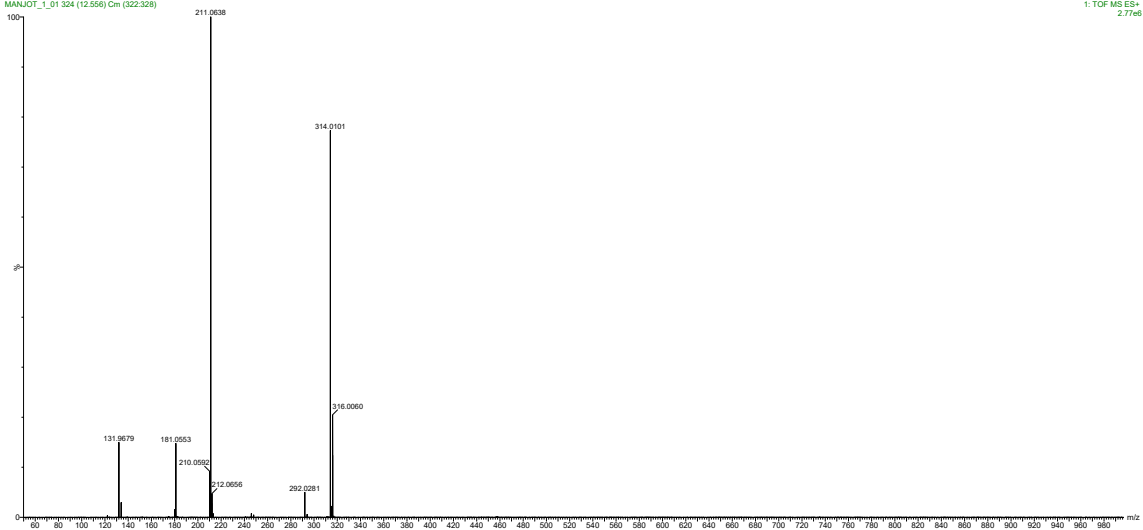



SAIF PANJAB UNIVERSITY, CHANDIGARH  
MANJOT\_1\_01\_593 (15.546) Cm (388.303)

SYNAPT.XSIB0A064

08-Sep-2022  
20:02:12  
1.TOF MS ES+  
1.52a3

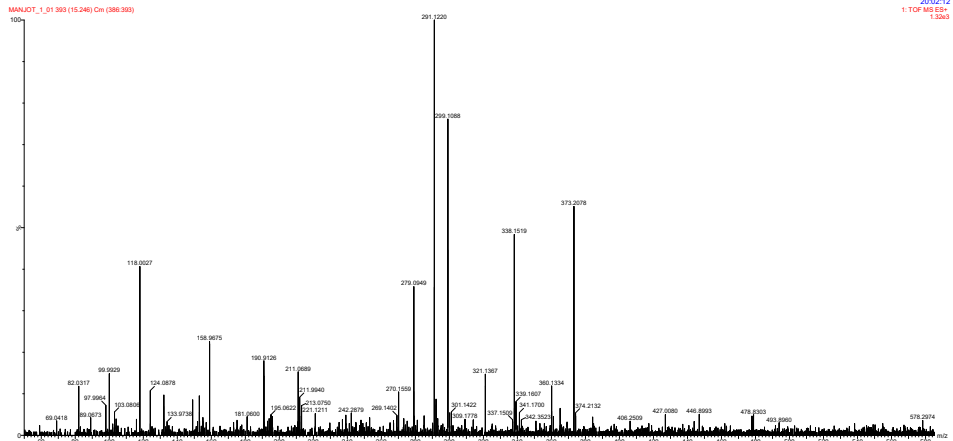

SAIF PANJAB UNIVERSITY, CHANDIGARH  
MANJOT\_2\_01\_3033 (11.749) Cm (296.305)

SYNAPT.XSIB0A064

08-Sep-2022  
21:35:11  
1.TOF MS ES+  
537

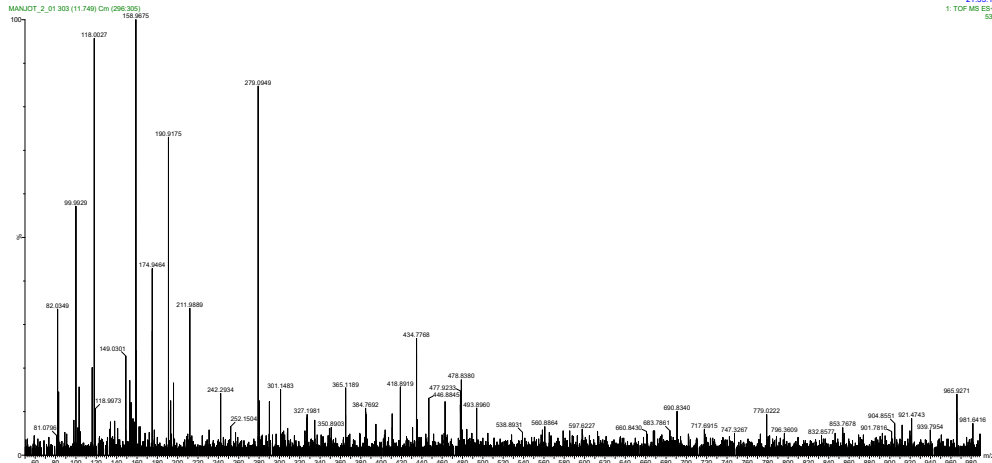

SAIF PANJAB UNIVERSITY, CHANDIGARH

SYNAPT.XSIB0A064

08-Sep-2022  
21:35:11  
1.TOF MS ES+  
5.99a5

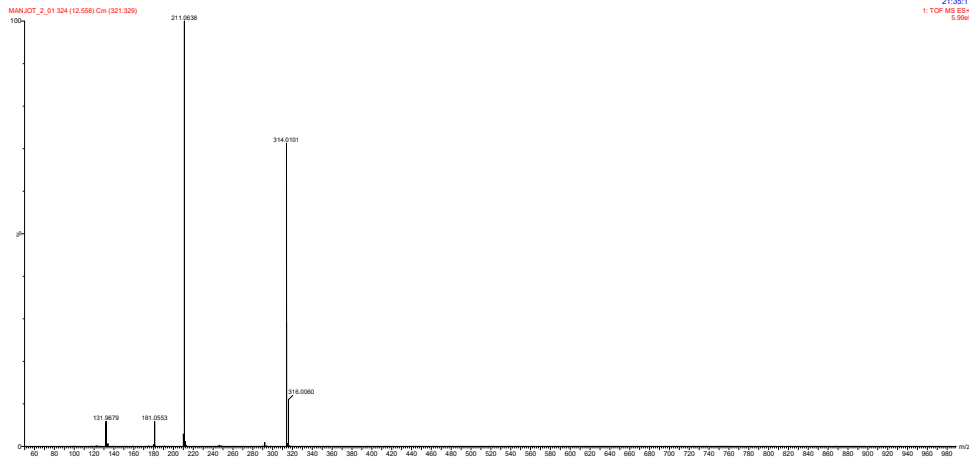

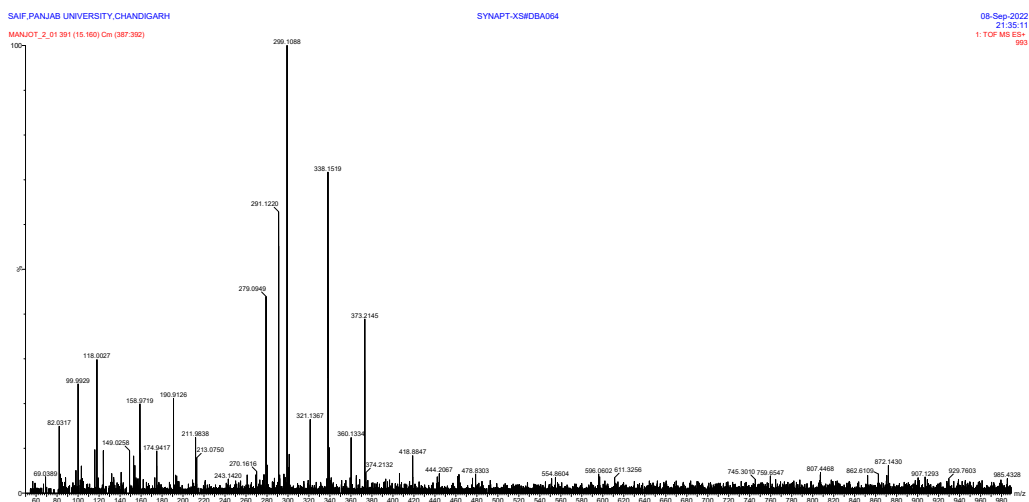

**Fig. S11:** LCMS-MS results obtained from photocatalytic degradation of THX insecticide.

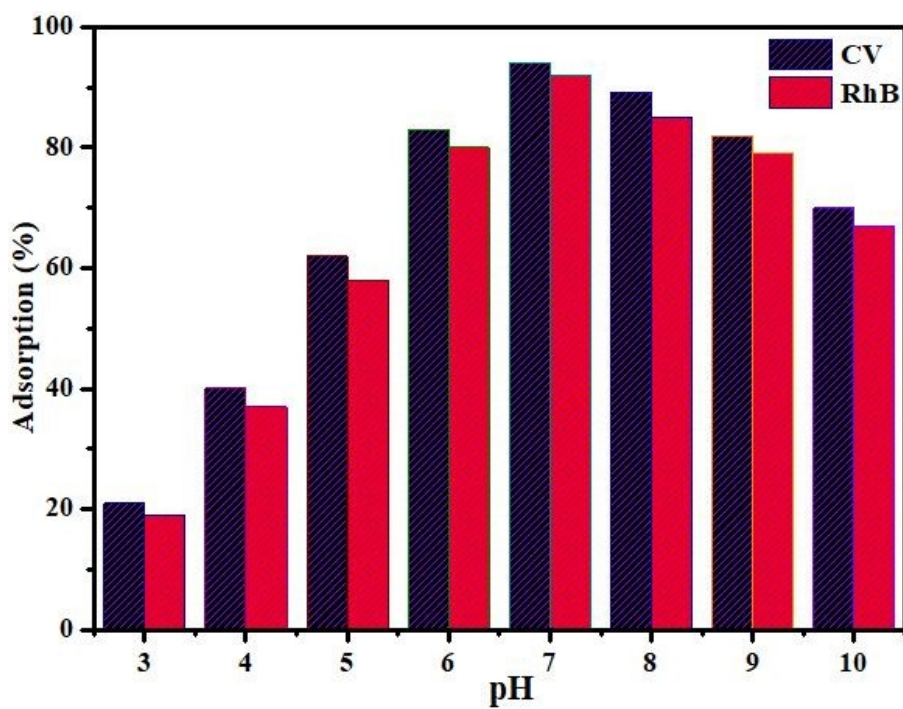

**Fig S12.** Effect of pH on the degradation of CV and RhB dyes

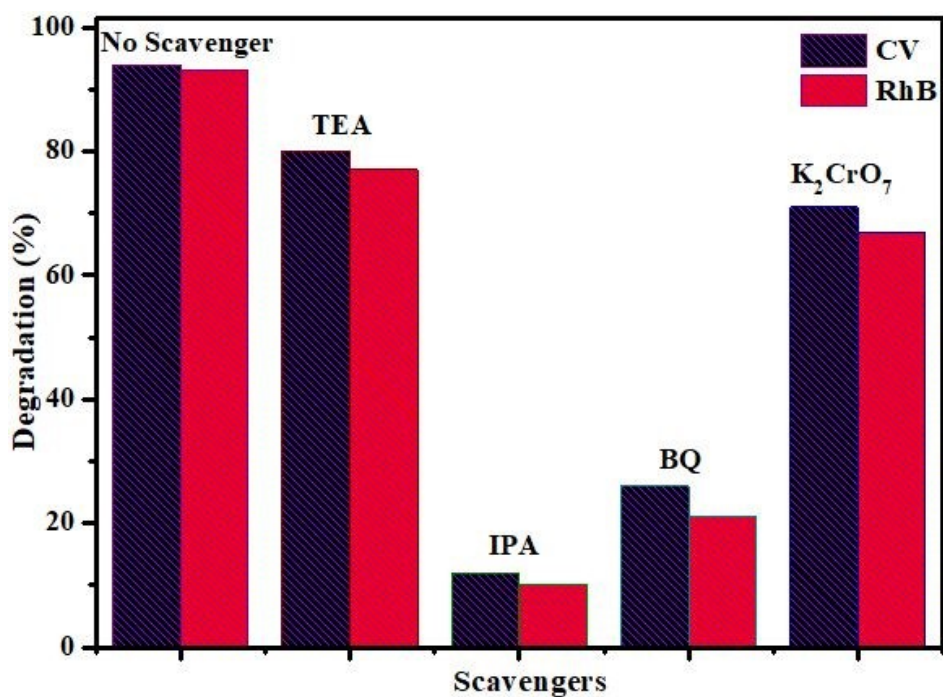

Fig S13. Effect of scavengers on the degradation of organic dyes

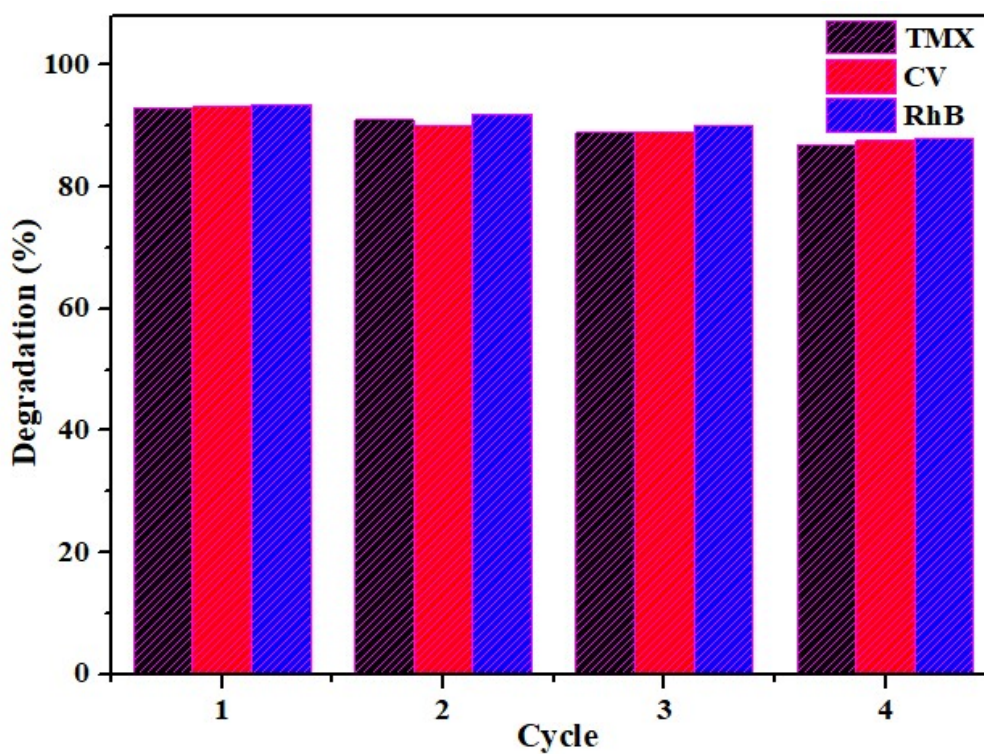

Fig. S14 Degradation efficiency of the NiO/Mn<sub>3</sub>O<sub>4</sub> heterojunction (NM-I) for TMX, CV and RhB over four successive runs

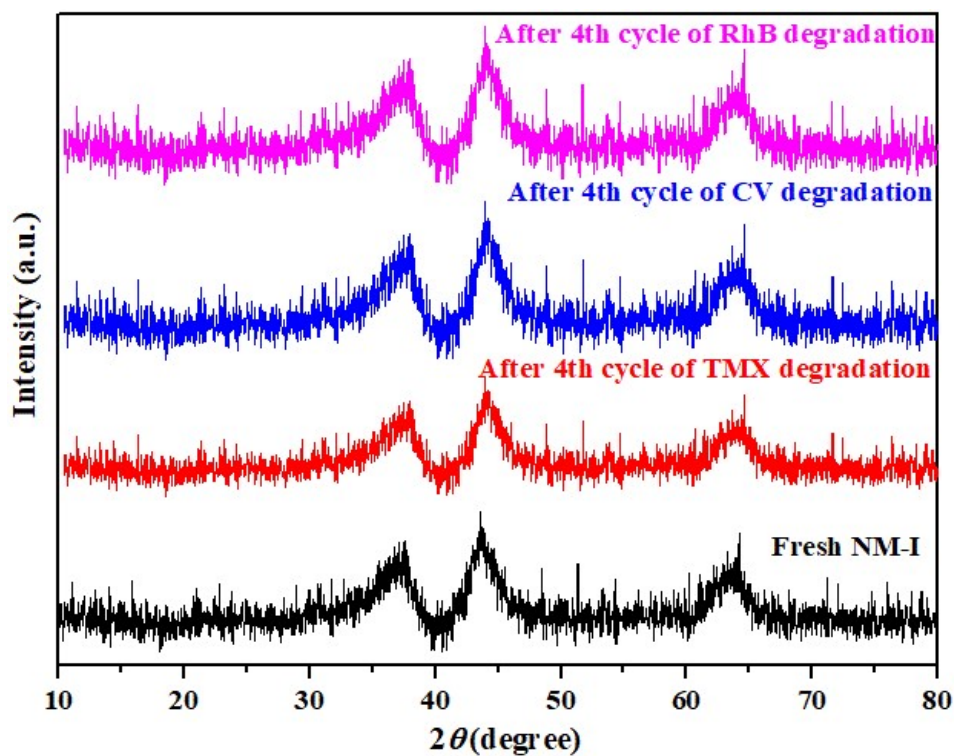

**Fig. S15** XRD spectrum of NM-I photocatalyst before and after 4 successive photocatalysis cycles

**Table**

**Table S1.** The calculated values of various parameters for NiO/Mn<sub>3</sub>O<sub>4</sub> heterojunction

| Parameter | NiO      | Mn <sub>3</sub> O <sub>4</sub> |
|-----------|----------|--------------------------------|
| $E_g$     | 3.2 eV   | 2.2 eV                         |
| $E_{CB}$  | -0.35 eV | -0.03 eV                       |
| $E_{VB}$  | +2.85 eV | 2.17 eV                        |
